# Supplementary material for: Jasmonic acid is a crucial signal transducer in heat shock induced sesquiterpene formation in Aquilaria sinensis
Source: PubMed Central journal article supplement (PMC4763180; doi:10.1038/srep21843), 2016-02-23

# Jasmonic acid is a crucial signal transducer in heat shock induced sesquiterpene formation in *Aquilaria sinensis*

Running title: Jasmonic acid and agarwood sesquiterpene in *Aquilaria sinensis*

Yan-hong Xu<sup>1,\*</sup>, Yong-cui Liao<sup>1,\*</sup>, Zheng Zhang<sup>1,2</sup>, Juan Liu<sup>1</sup>, Pei-wen Sun<sup>1</sup>, Zhi-hui Gao<sup>1</sup>, Chun Sui<sup>1</sup>, Jian-he Wei<sup>1,2,§</sup>

<sup>1</sup>Institute of Medicinal Plant Development, Chinese Academy of Medical Sciences & Peking Union Medical College, No. 151, Malianwa North Road, Haidian District, Beijing 100193, China

<sup>2</sup>Hainan Branch Institute of Medicinal Plant (Hainan Provincial Key Laboratory of Resources Conservation and Development of Southern Medicine), Chinese Academy of Medical Sciences & Peking Union Medical College, Wanning 571533, China

\*These authors contributed equally to this work.

§Corresponding author: E-mail, wjianh@263.net; Fax, 86 10 57833358

## Supplementary Data

Supplementary Table 1. Primers used in this study.

| Gene             | Primer name     | Sequence (5'-3')      |
|------------------|-----------------|-----------------------|
| <i>LOX</i>       | <i>LOX</i> -f   | GTGGTTGCGAGATGACGAA   |
|                  | <i>LOX</i> -r   | CAAGGAATGGCAGGTAGATG  |
| <i>AOS</i>       | <i>AOS</i> -f   | GTTCAAACACTCAGGGATGC  |
|                  | <i>AOS</i> -r   | AAAAGAGACGCTCGGCTAC   |
| <i>AOC</i>       | <i>AOC</i> -f   | AGCTCTTCTACACCTTCTACC |
|                  | <i>AOC</i> -r   | GCCTGCTTCTATCACAATCA  |
| <i>MYC2</i>      | <i>MYC2</i> -f  | AGTGATCCTGCCACCGCAG   |
|                  | <i>MYC2</i> -r  | GGCCTATTGTTACTCTCCAG  |
| Internal control | <i>GAPDH</i> -f | CTGGTATGGCATTCCGTGTA  |
|                  | <i>GAPDH</i> -r | AACCACATCCTCTTCGGTGTA |

**Supplementary Fig S1. Gas chromatography-mass spectroscopy profiles of sesquiterpene compounds in healthy control sample.** Total ion chromatogram of the products from healthy *A. sinensis* suspension cells.

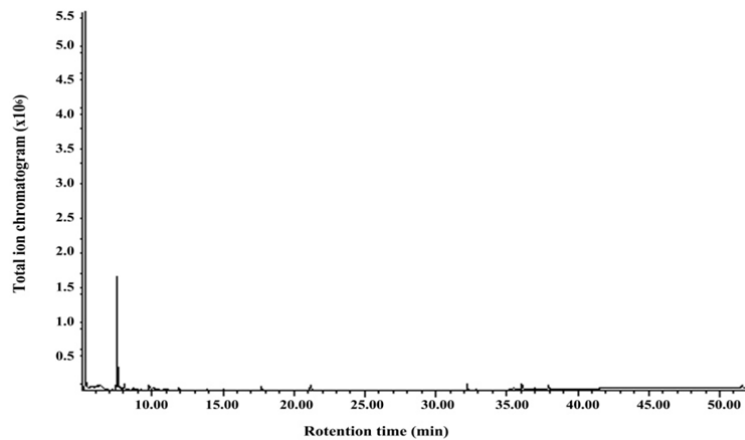

**Supplementary Fig S2. Gas chromatography-mass spectroscopy profiles of sesquiterpene compounds in healthy control and heat-shock-treated sample.** (A) Total ion chromatogram of the products from heat shock treated *A. sinensis* suspension cells. (B) Mass spectra of the sesquiterpenes and their authentic standards. Peak 1 is  $\alpha$ -guaiene, peak 2 is  $\alpha$ -humulene, and peak 3 is  $\delta$ -guaiene.

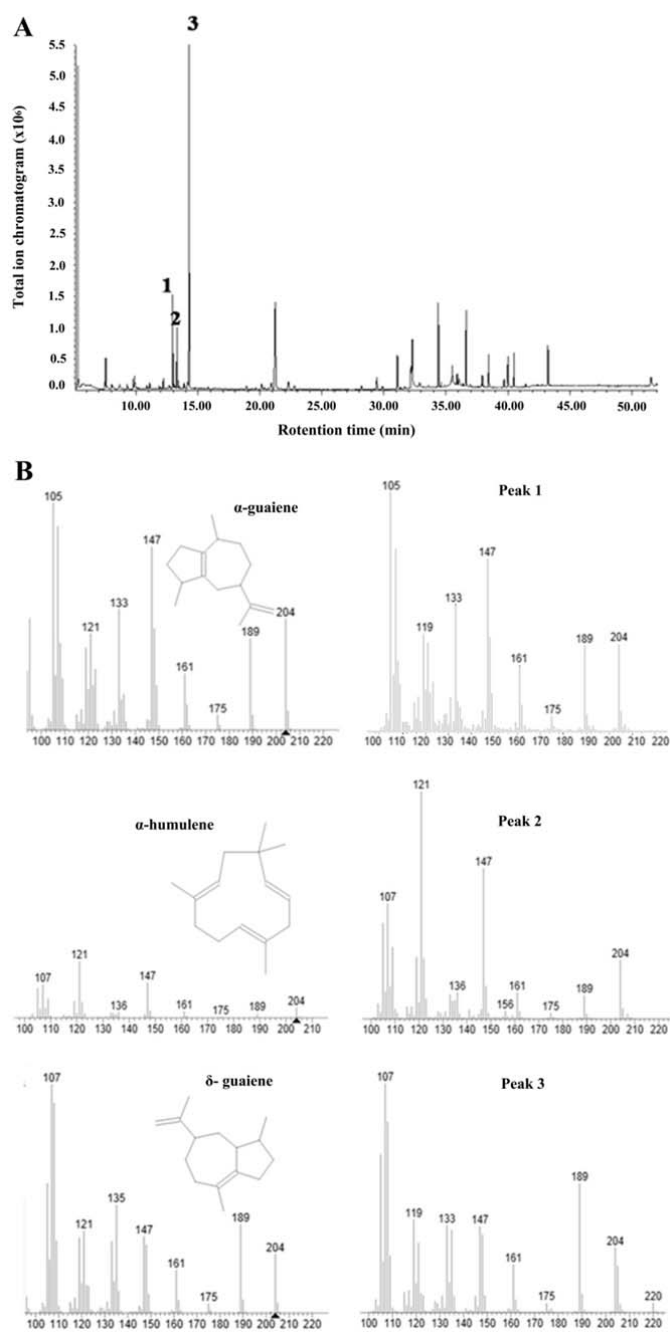

**Supplementary Fig S3. GC chromatograph of essential oil of agarwood in healthy and treated samples.** 1- Control, healthy sample; 2- H<sub>2</sub>O<sub>2</sub> treated sample; 3-MeJA treated sample; 4-SA treated sample.

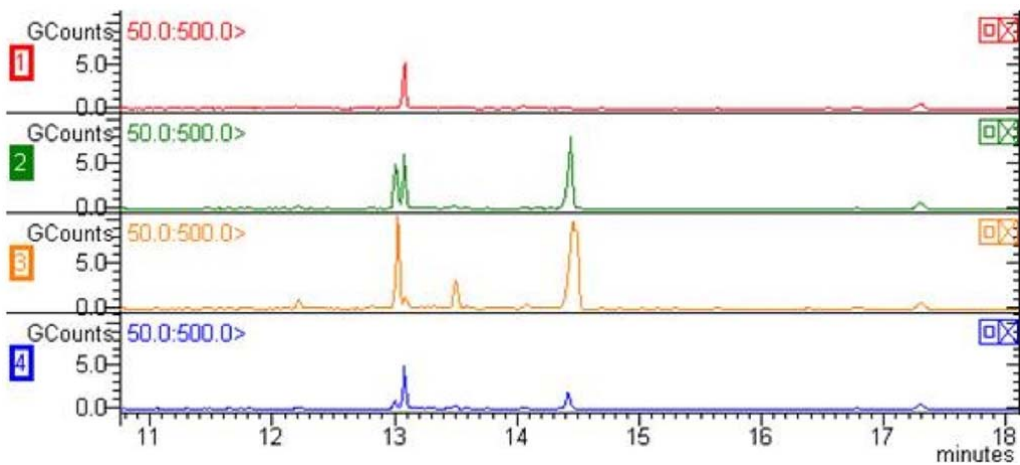

Supplement: srep21843-s1.pdf [file srep21843-s1.pdf]
